# Supplementary material for: Metal–organic framework derived petal-like Co3O4@CoNi2S4 hybrid on carbon cloth with enhanced performance for supercapacitors
Source: Royal Society of Chemistry journal article supplement (doi:10.1039/c9qi01681c), 2020-01-01
Supplement: c9qi01681c1.pdf [file c9qi01681c1.pdf]

***Supplementary Materials:***

**Metal-Organic Framework Nanosheet derived Petal-like  
Co<sub>3</sub>O<sub>4</sub>@CoNi<sub>2</sub>S<sub>4</sub> Hybrid on Carbon Cloth with Enhanced  
Performance for Supercapacitors**

Dandan Han<sup>\*a</sup>, Jinhe Wei<sup>a</sup>, Yuan Zhao<sup>a</sup>, Yifan Pan<sup>a</sup>, Ye Shen<sup>a</sup>, Yen Wei<sup>\*b</sup>,  
Liucheng Mao<sup>b</sup>

<sup>a</sup> *College of Chemistry and Pharmaceutical Engineering, Jilin Institute of Chemical  
Technology, Jilin 132022, China*

<sup>b</sup> *Department of Chemistry and the Tsinghua Center for Frontier Polymer Research,  
Tsinghua University, Beijing, 100084, China*

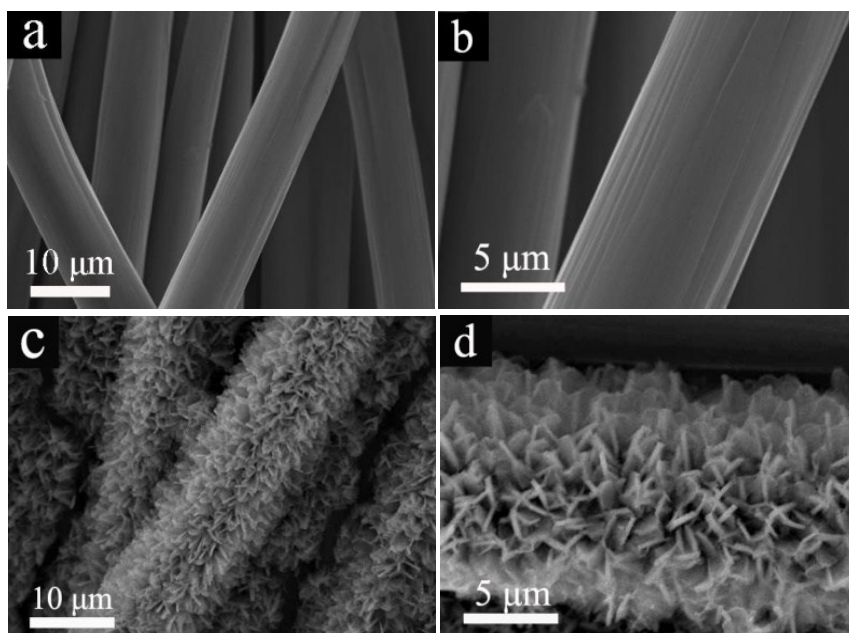

**Figure S1.** (a,b) SEM images of the clean carbon cloth and (c,d) the Co-MOF on carbon cloth.

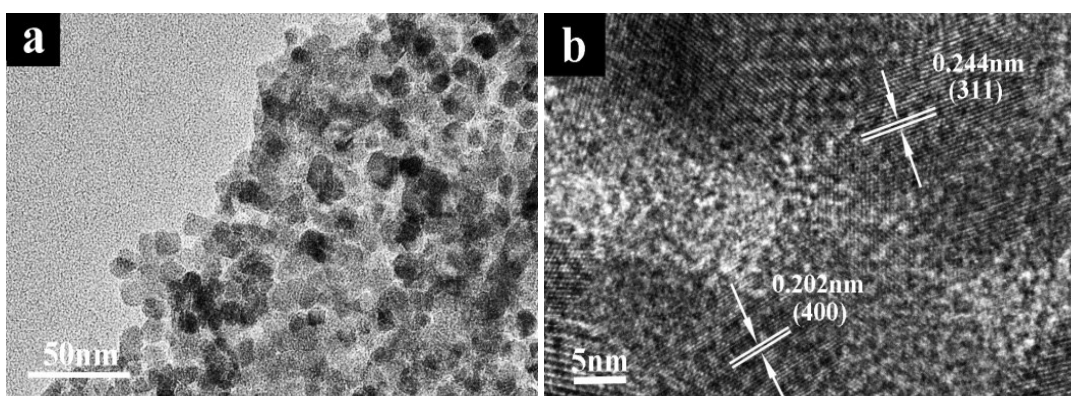

**Figure S2.** TEM images of the  $\text{Co}_3\text{O}_4$  nanosheets

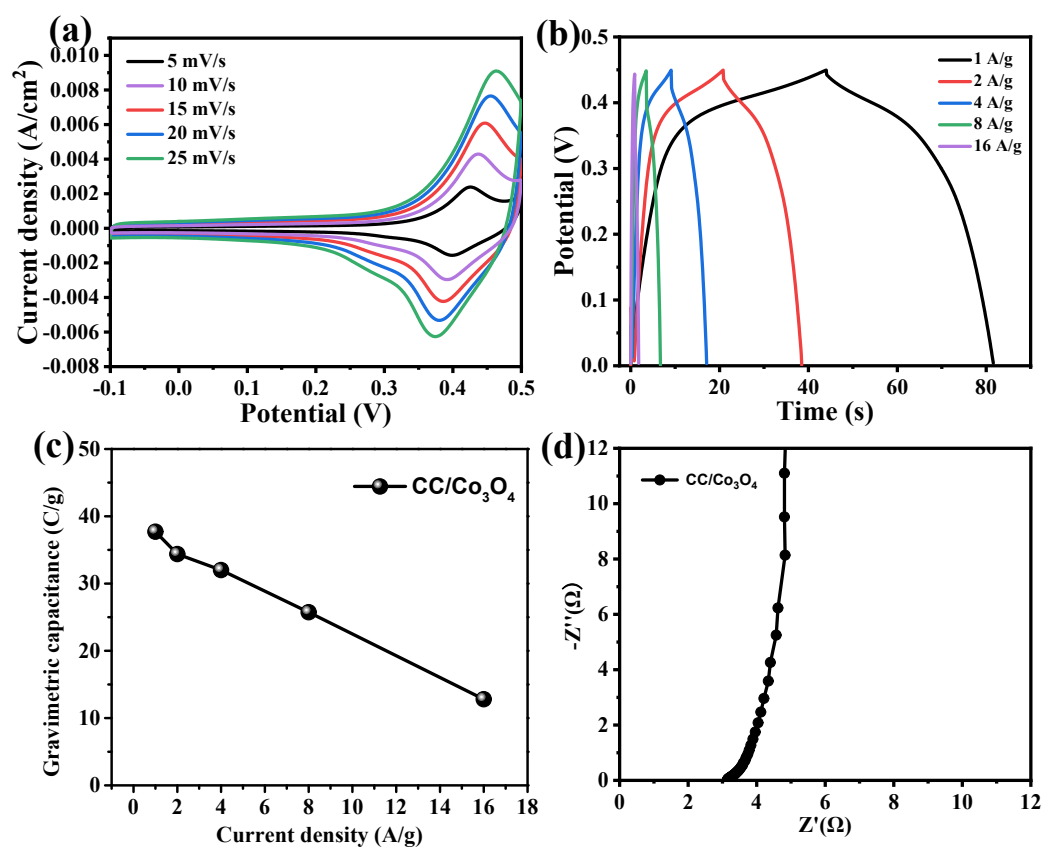

**Figure S3.** The electrochemical performance of the  $\text{Co}_3\text{O}_4$  electrode in 2 M KOH electrolyte: (a) CV curves, (b) GCD curves, (c) Specific capacitances at different current densities calculated from GCD curves, (d) EIS curve.

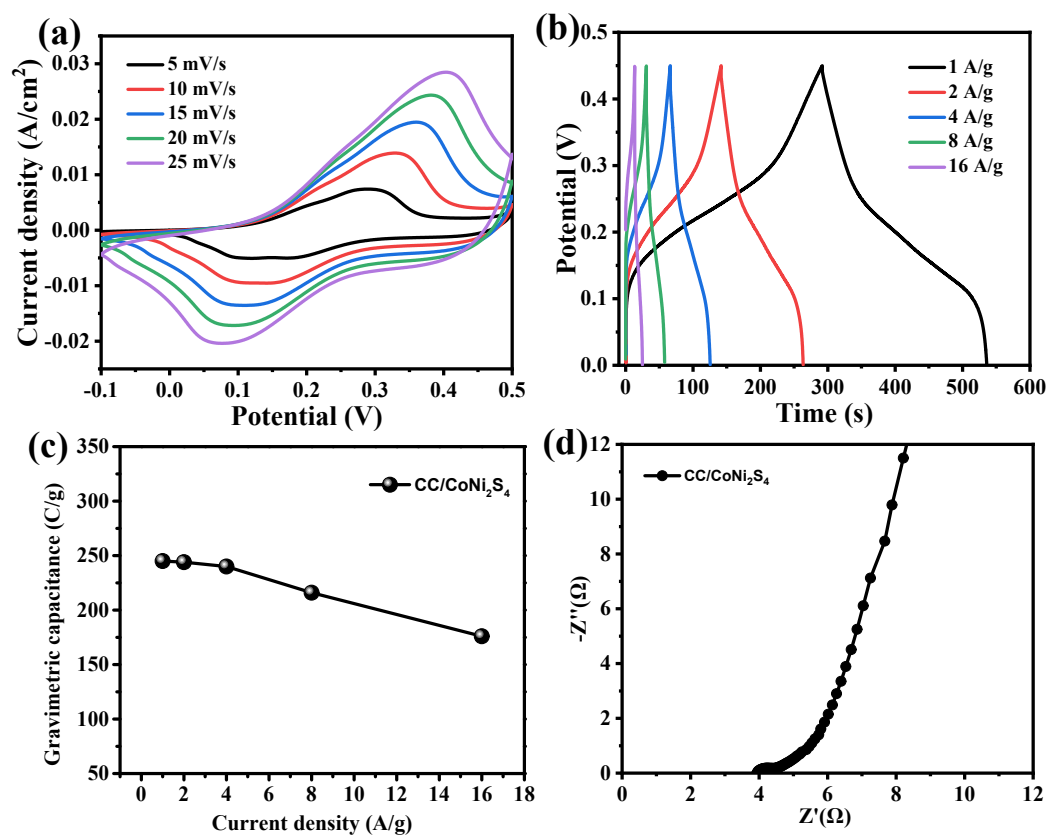

**Figure S4.** The electrochemical performance of the CoNi<sub>2</sub>S<sub>4</sub> electrode in 2 M KOH electrolyte: (a) CV curves, (b) GCD curves, (c) Specific capacitances at different current densities calculated from GCD curves, (d) EIS curve.

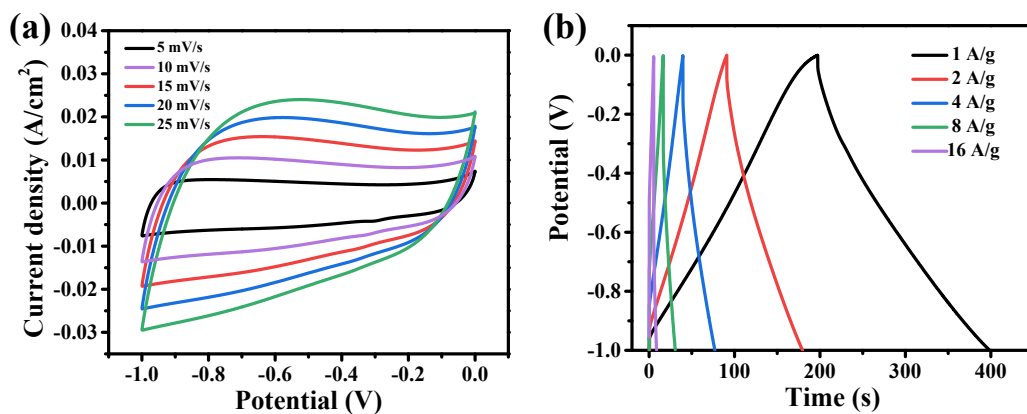

**Figure S5.** The electrochemical performance of the electrode in 2 M KOH electrolyte: (a) CV curves of CC/Co<sub>3</sub>O<sub>4</sub>@CoNi<sub>2</sub>S<sub>4</sub> and AC electrodes at a scan rate of 5 mV·s<sup>-1</sup>, (b) CV curves of AC (c) GCD curves of AC, (d) EIS curve of AC.

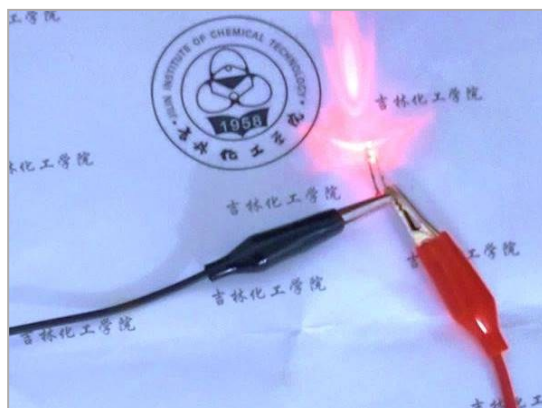

**Figure S6.** The photograph of an LED is powered by the two ASCs in series.

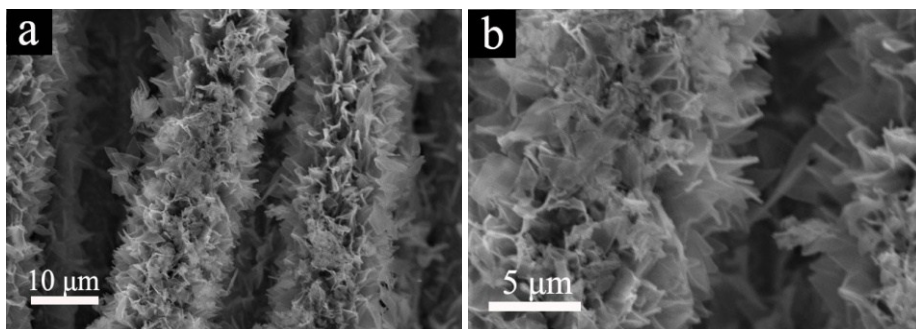

**Figure S7.** The SEM images of CC/Co<sub>3</sub>O<sub>4</sub>@CoNi<sub>2</sub>S<sub>4</sub> on carbon cloth after 10000 cycles.
